# Supplementary material for: Electrochemically induced amorphous and porous VOx/N-doped carbon spheres as a cathode for advanced aqueous zinc-ion batteries
Source: Royal Society of Chemistry journal article supplement (doi:10.1039/d2qi02144g), 2022-12-07
Supplement: d2qi02144g1.pdf [file d2qi02144g1.pdf]

## Supporting information

### **Electrochemically induced amorphous VO<sub>x</sub>/N doped carbon porous spheres cathode for advanced aqueous zinc-ion battery**

Jujun Yuan,<sup>a</sup> Yunfei Gan,<sup>a,b</sup> Jirong Mou,<sup>a</sup> Xiangdong Ma,<sup>a</sup> Xiaokang Li,<sup>\*a,b</sup> Junxia Meng,<sup>a</sup> Lishuang Xu,<sup>a</sup> Xianke Zhang,<sup>\*a</sup> Haishan He,<sup>a,b</sup> Meiqi Mu,<sup>a</sup> Jun Liu,<sup>\*a,c</sup>

<sup>a</sup>Key Laboratory of New Energy Materials and Low Carbon Technologies, College of Physics and Electronics, Gannan Normal University, Ganzhou 341000, PR China

<sup>b</sup>College of Chemistry and Chemical Engineering, Gannan Normal University, Ganzhou 341000, PR China

<sup>c</sup>School of Materials Science and Engineering, South China University of Technology, Guangzhou 510641, P. R. China

\*Corresponding authors: [lixiaokang@gnnu.edu.cn](mailto:lixiaokang@gnnu.edu.cn) ; [zhangxianke77@163.com](mailto:zhangxianke77@163.com) ; [msjliu@scut.edu.cn](mailto:msjliu@scut.edu.cn)

### Detailed calculation processes of Zn<sup>2+</sup> transfer coefficient

The Zn<sup>2+</sup> diffusion is measured based on the analysis of impedance and according to Equations (1) and (2):

$$D_{\text{Zn}^{2+}} = R^2 T^2 / 2n^4 F^4 \sigma_w^2 A^2 C^2 \quad (1)$$

$$Z' = R + \sigma_w \omega^{-1/2} \quad (2)$$

EIS was employed to calculate the Zn<sup>2+</sup> transfer coefficient to study the effect of crystallinity on potassium storage performance. In Equations (1) and (2), R, T, n, F, A, C, and  $\sigma_w$  are the gas constant (8.314 J mol<sup>-1</sup> K<sup>-1</sup>), the absolute temperature (301.15 K), the number of electrons per molecule during oxidation (2), the Faraday's constant (96485 C mol<sup>-1</sup>), the surface area of the electrode (1.13 cm<sup>2</sup>), the Zn<sup>2+</sup> concentration in the electrode material (3.0 mol L<sup>-1</sup>), and the Warburg coefficient, respectively.

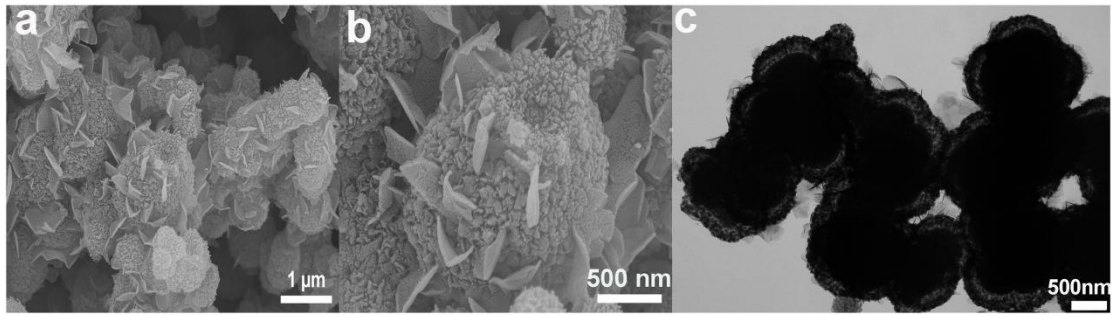

Fig.S1 (a,b) SEM images for  $V_2O_3/NC-3h$  porous spheres at different magnifications. (c) TEM image for  $V_2O_3/NC-3h$  porous spheres

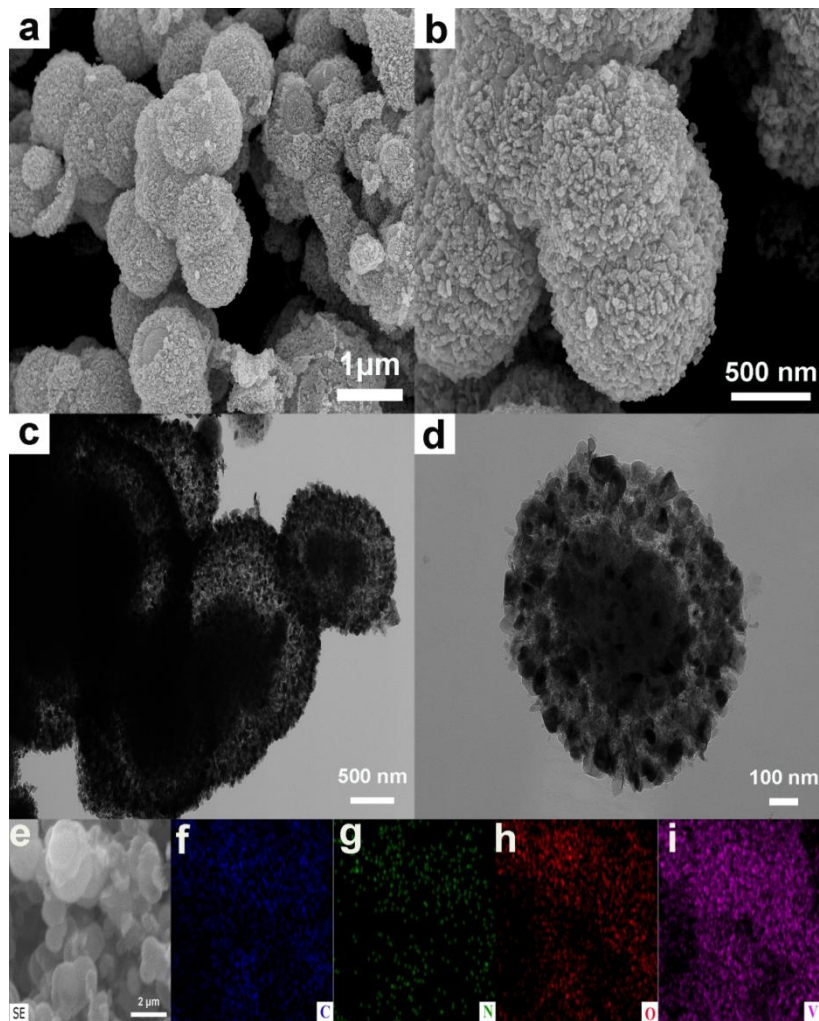

**Fig. S2** (a,b) SEM images for  $V_2O_3/NC-6h$  porous spheres at different magnifications. (c,d) TEM images for  $V_2O_3/NC-6h$  porous spheres at different magnifications. (e) EDS mapping for  $V_2O_3/NC-6h$  porous spheres.

**Table S1.** The electrochemical performances for V-related oxides/carbon composites with different morphologies fabricated using different strategies in ZIBs.

| <b>Morphology</b>                               | <b>Synthesis method</b>                                                     | <b>Capacity retention<br/>(mAh g<sup>-1</sup>)</b> | <b>Referance</b> |
|-------------------------------------------------|-----------------------------------------------------------------------------|----------------------------------------------------|------------------|
| Graphene/VO <sub>2</sub> composite              | Freeze-drying/high temperature reduction                                    | 240 (1000 cycles)<br>at 4 A g <sup>-1</sup>        | [15]             |
| V <sub>2</sub> O <sub>3</sub> /carbon composite | Ball-milling route                                                          | 84(2000 cycles)<br>At 5 A g <sup>-1</sup>          | [29]             |
| V <sub>2</sub> O <sub>5</sub> /3D nanocarbon    | Atomic layer deposition                                                     | 133(800 cycles)<br>At 5 A g <sup>-1</sup>          | [30]             |
| 3D spongy VO <sub>2</sub> -graphene             | Hydrothermal/chemical reduction                                             | 267(5000cycles)<br>At 10A g <sup>-1</sup>          | [31]             |
| Network C@V <sub>2</sub> O <sub>5</sub>         | Chitosan-assisted hydrothermal process                                      | 250(2000 cycles)<br>At 0.5A g <sup>-1</sup>        | [41]             |
| V <sub>2</sub> O <sub>5</sub> @PEDOT/C C        | Solvothermal reaction/thermal treatment                                     | 223(2000cycles)<br>At 5A g <sup>-1</sup>           | [42]             |
| Hydrated V <sub>2</sub> O <sub>5</sub> /PPy     | Hydrothermal/chemical polymerization                                        | 165(5000 cycles)<br>At 10A g <sup>-1</sup>         | [44]             |
| VO <sub>x</sub> /NC porous spheres              | Electrochemically inducing V <sub>2</sub> O <sub>3</sub> /NC porous spheres | 233(2000 cycles)<br>At 5A g <sup>-1</sup>          | This work        |
